# Supplementary material for: Voltage Sensing in Bacterial Protein Translocation
Source: PubMed Central journal article supplement (PMC7023257; doi:10.3390/biom10010078), 2020-01-03
Supplement: biomolecules-10-00078-s001.pdf [file biomolecules-10-00078-s001.pdf]

# Voltage Sensing in Bacterial Protein Translocation

Denis G. Knyazev<sup>1,‡</sup>, Roland Kuttner<sup>1,‡</sup>, Ana-Nicoleta Bondar<sup>2</sup>, Mirjam Zimmerman<sup>1</sup>, Christine Siligan<sup>1</sup> and Peter Pohl<sup>1,\*</sup>

<sup>1</sup> Institute of Biophysics, Johannes Kepler University Linz, Gruberstr. 40, 4020 Linz, Austria; denis.knyazev@jku.at (D.G.K.); Rolandkuttner@gmx.at (R.K.); irjam\_zimmermann@hotmail.com (M.Z.); Christine.Siligan@jku.at (C.S.)

<sup>2</sup> Freie Universität Berlin, Department of Physics, Theoretical Molecular Biophysics Group, Arnimallee 14, D-14195 Berlin, Germany; nbondar@zedat.fu-berlin.de

‡ These authors contributed equally to this work

\* Correspondence: Peter.Pohl@jku.at

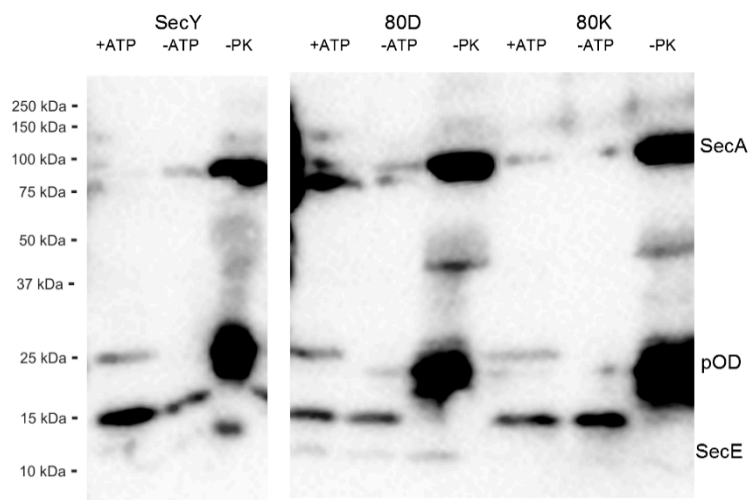

**Figure S1: Translocation Assay.** Western Blot detection with HRP - anti-His (Milenitec) Bands at 27 kDa show translocated proOmpA-DHFR in ATP positive samples for SecYEG “wild type” (single cysteine SecYA204C), and with mutations L80D, L80K.

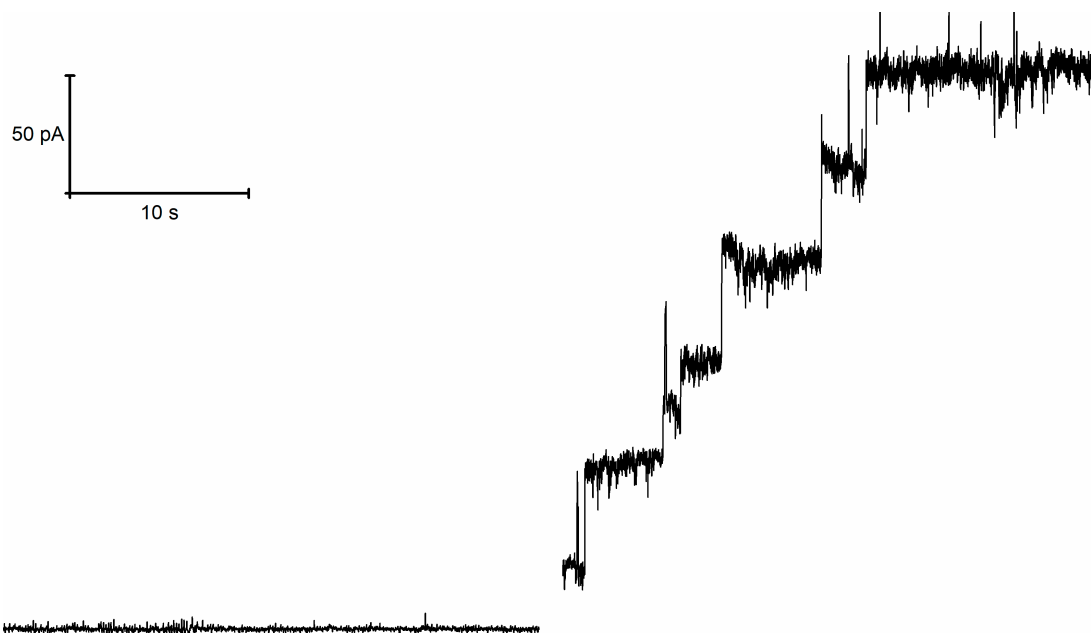

**Figure S2.** Controls for SecY(329C)EG. Left: The channels remained closed in the absence of the signal peptide from pOA. Application of  $\varphi = -85$  mV did not elicit an increment in current. Right: Voltage triggered closings of SecYEG in complex with the signal peptide from pOA (in the absence of KTT). Application of much smaller  $\varphi$  values ( $= -85$  mV) rendered the closing kinetics comparable to those observed under cross-linking conditions (Figure 2A,C,  $\varphi = -140$  mV).

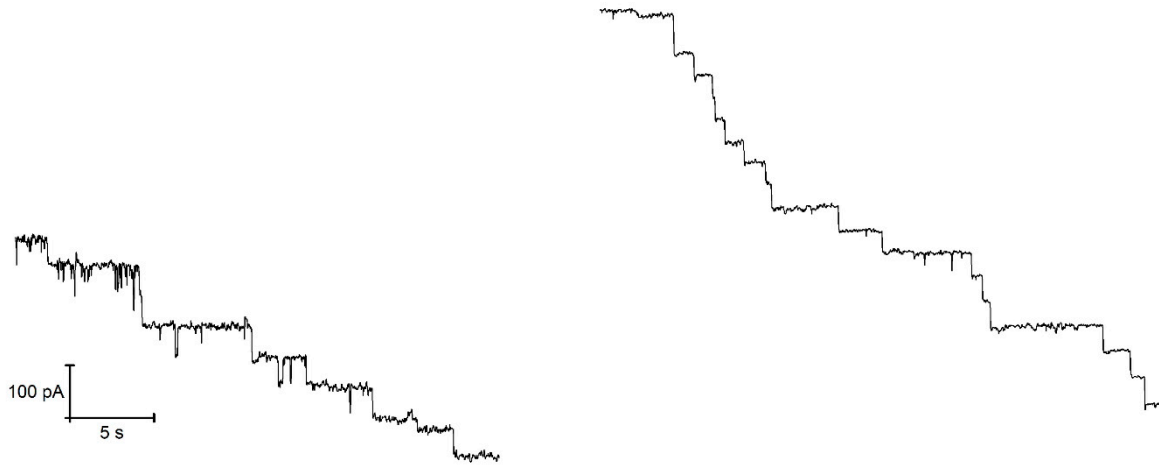

**Figure S3.** Voltage gated closings of (i) the SecYEG in complex with FtsQ-RNC (left panel) and (ii) the SecY(F67C)E(S120C)G mutant with the plug crosslinked to SecE by 1 mM KTT (right panel) at  $\varphi = +105$  mV.
